# Supplementary material for: Preparation of Colorimetric Sensor Array System to Evaluate the Effects of Alginate Edible Coating on Boiled-Dried Anchovy
Source: MDPI journal article supplement (doi:10.3390/foods12030638), 2023-02-02
Supplement: s1 [file s1]

Table S1. Delta E value.

| Sample/<br>Dye No. | 1     | 2     | 3     | 4     | 5      | 6     | 7      | 8      | 9     |
|--------------------|-------|-------|-------|-------|--------|-------|--------|--------|-------|
| day 1 25NC         | 30.84 | 33.91 | 23.07 | 43.53 | 19.61  | 60.41 | 101.98 | 110.48 | 49.09 |
| day 1 25C          | 2.99  | 12.95 | 26.12 | 12.80 | 31.46  | 18.53 | 136.51 | 41.87  | 5.81  |
| day1 35NC          | 41.96 | 28.25 | 48.89 | 33.50 | 20.25  | 25.21 | 136.71 | 95.48  | 24.44 |
| day1 35C           | 10.87 | 45.09 | 22.56 | 2.41  | 12.23  | 24.59 | 131.47 | 76.78  | 43.70 |
| day1 45NC          | 56.43 | 42.17 | 60.67 | 53.88 | 60.38  | 20.39 | 97.70  | 110.15 | 8.08  |
| day1 45C           | 29.04 | 18.06 | 52.21 | 11.05 | 42.78  | 21.41 | 133.16 | 93.34  | 4.16  |
| day5 25NC          | 37.39 | 11.86 | 18.53 | 4.16  | 48.28  | 29.63 | 136.48 | 85.26  | 22.76 |
| day5 25C           | 7.93  | 12.77 | 6.50  | 30.21 | 47.53  | 38.17 | 132.51 | 65.62  | 34.47 |
| day5 35NC          | 69.45 | 27.69 | 32.77 | 17.60 | 35.77  | 25.86 | 118.39 | 107.72 | 0.00  |
| day5 35C           | 21.28 | 52.89 | 47.36 | 16.15 | 52.81  | 26.83 | 130.97 | 51.49  | 60.85 |
| day5 45NC          | 61.42 | 19.54 | 28.60 | 20.92 | 77.51  | 37.28 | 131.55 | 78.64  | 30.52 |
| day5 45C           | 53.43 | 30.05 | 9.76  | 36.60 | 66.46  | 41.13 | 130.85 | 61.28  | 33.70 |
| day10 25NC         | 50.13 | 6.16  | 22.84 | 27.02 | 44.38  | 29.77 | 133.12 | 71.23  | 24.08 |
| day10 25C          | 26.89 | 35.70 | 34.83 | 30.61 | 30.84  | 24.96 | 134.97 | 49.94  | 36.99 |
| day10 35NC         | 71.33 | 17.60 | 37.57 | 11.84 | 56.46  | 21.61 | 136.39 | 42.51  | 38.57 |
| day10 35C          | 55.19 | 22.14 | 29.25 | 25.14 | 56.75  | 31.38 | 133.52 | 57.29  | 40.02 |
| day10 45NC         | 79.32 | 26.40 | 33.10 | 67.76 | 63.91  | 39.06 | 121.66 | 72.15  | 40.23 |
| day10 45C          | 64.97 | 7.58  | 28.01 | 49.33 | 72.96  | 40.61 | 125.13 | 50.94  | 42.22 |
| day20 25NC         | 79.73 | 26.47 | 34.53 | 29.68 | 27.99  | 23.96 | 123.99 | 104.78 | 15.81 |
| day20 25C          | 69.56 | 16.38 | 43.46 | 5.54  | 36.51  | 26.42 | 129.14 | 102.76 | 36.42 |
| day20 35NC         | 79.46 | 8.34  | 31.29 | 31.51 | 46.82  | 32.14 | 124.99 | 102.81 | 6.35  |
| day20 35C          | 63.13 | 28.84 | 49.52 | 37.36 | 69.14  | 29.20 | 133.09 | 65.26  | 44.56 |
| day20 45NC         | 66.36 | 26.41 | 35.79 | 31.43 | 108.76 | 12.65 | 136.48 | 91.30  | 19.84 |
| day20 45C          | 64.35 | 12.00 | 28.99 | 28.92 | 78.18  | 38.36 | 135.75 | 70.56  | 24.50 |
| day30 25NC         | 66.45 | 37.35 | 31.26 | 3.35  | 67.06  | 16.70 | 127.12 | 83.16  | 24.38 |
| day30 25C          | 51.15 | 29.06 | 35.71 | 29.53 | 72.13  | 19.90 | 96.02  | 50.91  | 30.12 |
| day30 35NC         | 52.97 | 41.70 | 9.71  | 17.87 | 73.95  | 35.63 | 135.08 | 55.73  | 50.11 |
| day30 35C          | 53.36 | 39.02 | 35.11 | 31.23 | 73.45  | 26.76 | 129.60 | 52.74  | 53.84 |
| day30 45NC         | 67.02 | 37.52 | 37.49 | 40.16 | 88.23  | 40.03 | 136.55 | 74.25  | 55.97 |
| day30 45C          | 57.40 | 24.35 | 37.18 | 41.56 | 74.73  | 31.31 | 129.53 | 66.53  | 39.11 |
| Average            | 51.39 | 25.94 | 32.42 | 27.42 | 55.24  | 29.66 | 128.01 | 74.77  | 31.36 |
| Order              | 4     | 9     | 5     | 8     | 3      | 7     | 1      | 2      | 6     |
